1 **Targeted mutagenesis of the *Arabidopsis* GROWTH-**  
2 **REGULATING FACTOR (GRF) gene family suggests**  
3 **competition of multiplexed sgRNAs for Cas9**  
4 **apoprotein**

5  
6 Juan Angulo, Christopher P Astin<sup>2</sup>, Olivia Bauer<sup>2</sup>, Kelan J Blash<sup>2</sup>, Natalee M Bowen<sup>2</sup>, Nneoma J  
7 Chukwudinma<sup>1</sup>, Austin S Dinofrio<sup>2</sup>, Donald O Faletti<sup>2</sup>, Alexa M Ghulam<sup>1</sup>, Cloe M Gusinde-Duffy<sup>1</sup>,  
8 Kamaria J Horace<sup>1</sup>, Andrew M Ingram<sup>2</sup>, Kylie E Isaack, Geon Jeong<sup>2</sup>, Randolph J Kiser<sup>1</sup>, Jason  
9 S Kobylanski<sup>1</sup>, Madeline R Long<sup>2</sup>, Grace A Manning<sup>1</sup>, Julie M Morales<sup>2</sup>, Kevin H Nguyen<sup>1</sup>, Robin  
10 T Pham<sup>1</sup>, Monthip H Phillips<sup>2</sup>, Tanner W Reel<sup>1</sup>, Jenny E Seo<sup>1</sup>, Hiep D Vo<sup>1</sup>, Alexander M  
11 Wukuson<sup>2</sup>, Kathryn A Yeary<sup>2</sup>, Grace Y Zheng<sup>2</sup>, and Wolfgang Lukowitz\*

12  
13 University of Georgia, Department of Plant Biology, Athens, USA

14 1 P BIO3660L class fall semester 2016

15 2 P BIO3660L class fall semester 2018

16 \* lukowitz@uga.edu

17  
18 Short title: CRISPR/Cas9 mutagenesis of the *Arabidopsis* GRF family

19  
20 Keywords: CRISPR, T-DNA vector, transgene-free, seed bio-fluorescence selection, LED  
21 illumination, teaching lab, citizen science, *Bsal*, sgRNA multiplexing, tRNA buffer, EC1

## 22 **Abstract**

23

24 Genome editing in plants typically relies on T-DNA plasmids that are mobilized by  
25 Agrobacterium-mediated transformation to deliver the CRISPR/Cas9 machinery. Here, we  
26 introduce a series of CRISPR/Cas9 T-DNA vectors for minimal lab settings, such as in the  
27 classroom or citizen science projects. Spacer sequences targeting genes of interest can be  
28 inserted as annealed short oligonucleotides in a single straightforward cloning step.  
29 Fluorescent markers expressed in mature seeds enable reliable selection of transgenic as well  
30 as transgene-free individuals using a combination of inexpensive LED lamps and colored-glass  
31 alternative filters. Testing these tools on the *Arabidopsis* GROWTH-REGULATING FACTOR  
32 (GRF) gene family, we found that Cas9 expression from an EGG CELL1 (EC1) promoter  
33 resulted in tenfold lower mutation rates than expression from a UBIQUITIN10 (UBQ10)  
34 promoter. A collection of *bona fide* null mutations in all nine GRF genes could be established  
35 with little effort. Finally, we explored the effects of simultaneously targeting two, four and eight  
36 GRF genes on the rate of induced mutations at each target locus. Multiplexing caused strong  
37 interference effects: while mutation rates at some loci remained consistently high, mutation  
38 rates at other loci dropped dramatically with increasing number of single guide RNA species.  
39 Our results suggest potential detrimental genetic interaction between induced mutations as well  
40 as competition of CRISPR RNAs for a limiting amount of Cas9 apoprotein.

41

## 42 **Introduction**

43

44 CRISPR/Cas complexes can be programmed to bind virtually any DNA sequence and thus enable  
45 applications as diverse as chemical modification of target DNA, directed manipulation of gene

*CRISPR/Cas9-mutagenesis of the Arabidopsis GRF family*

46 transcription, or genome editing by homologous recombination (for an overview of recent work  
47 in plants see [Ma & al., 2016](#); [Soyars & al., 2018](#); [Manghwar & al., 2019](#); [Zhang & al., 2019](#)).

48 Natural CRISPR/Cas systems function predominantly as sequence-specific endo-nucleases that  
49 help bacterial cells clear invading plasmids or phages ([Terns & Terns, 2011](#)). Not surprisingly,  
50 the first and arguably one of the most valuable technical applications was to re-purpose this  
51 activity for mutagenizing specific loci in a genome of interest. The type II CRISPR-system of  
52 *Streptococcus pyogenes* can be reduced to two components: a multi-domain Cas9 apo-protein  
53 and a single guide RNA (sgRNA, a fusion of the two RNA components found in natural  
54 complexes; [Jinek & al., 2012](#)). As in bacteria, sgRNA/Cas9 complexes assembled *in vitro* or  
55 expressed in a target organism are homology-guided endo-nucleases: the 5'-most ~20  
56 nucleotides of the sgRNA, called spacer, are free to hybridize with complementary sequences,  
57 called protospacer, in the target genome; if the protospacer sequence is followed by a short  
58 protospacer-associated motif (PAM; the minimal Cas9 consensus is 'NGG'), Cas9 induces a  
59 double-strand-break in the target DNA (three nucleotides upstream of the protospacer/PAM  
60 junction, leaving blunt ends). In most cell types, such lesions are repaired by non-homologous  
61 end joining, an error-prone process that frequently introduces small deletions or insertions.  
62

63 We were interested in using CRISPR/Cas9 nucleases as part of a plant molecular biology  
64 teaching lab and needed to simplify the experimental workflow as much as possible. A series of  
65 T-DNA vectors that were designed for adding spacer sequences targeting genes of interest as  
66 short, synthetic oligonucleotide-assemblies in a single cloning step ([Xing & al., 2014](#); [Wang &  
67 al., 2015](#)) provided an attractive platform for this purpose. We modified these vectors by  
68 replacing their antibiotic selection marker with makers enabling selection and counter-selection  
69 of transgenic plants on the basis of seed fluorescence (similar to [Gao & al., 2014](#)). In addition,  
70 we verified that seed fluorescence could be detected with standard dissecting microscopes

## CRISPR/Cas9-mutagenesis of the *Arabidopsis* GRF family

71 using an inexpensive external illumination consisting of high-intensity LED lights and colored-  
72 glass alternative emission filters.  
73  
74 GROWTH-REGULATING FACTORS (GRFs) encode DNA-binding proteins that associate with  
75 GRF-INTERACTING FACTORS (GIFs) to regulate gene transcription, presumably by recruiting  
76 chromatin remodelers (reviewed in [Omidbakhshfard & al., 2015](#); [Kim, 2019](#)). To date, GRF  
77 genes have only been found in the genomes of land plants and their algal precursors (together  
78 forming the streptophyte clade). The nine GRF genes of *Arabidopsis* are thought to affect cell  
79 division and expansion in the context of various developmental processes, but their genetic  
80 analysis is hampered by functional overlap and, in many cases, the lack of *bona fide* null alleles.  
81 Using our tools in the teaching lab, we were able to establish a collection of reference alleles  
82 truncating the predicted proteins prior to the DNA-binding domain. When we multiplexed  
83 sgRNAs to simultaneously target two, four, and eight GRF genes we observed vastly different  
84 rates of CRISPR/Cas9-induced lesions at different target loci, suggesting strong interference  
85 effects.

86

## 87 **Results**

88

### 89 **CRISPR/Cas9 T-DNA vectors for selecting & counter-** 90 **selecting transgenic seeds on the basis of bio-fluorescence**

91 T-DNAs of the Cambia family ([www.cambia.org](http://www.cambia.org); derived from pPZP; [Hajdukiewicz & al., 1994](#))  
92 are among the most widely used plasmid vectors for plant transformation. Molecular cloning is  
93 greatly facilitated by their relatively small size and high copy numbers in *E. coli*; their pVP1  
94 origin ensures effective propagation in *Agrobacterium* and high transformation rates with a wide



*CRISPR/Cas9-mutagenesis of the Arabidopsis GRF family*

115 gene-specific spacer sequence (represented with 'Ns') or more complex assemblies for  
116 expression of multiple sgRNAs for the same T-DNA can be inserted into the *BsaI* cloning site;  
117 the ends generated by *BsaI* have different 5' overhangs; the 'g' highlighted in dark blue  
118 represents the transcriptional start site of the U6-26 promoter. (c) Vectors are named after the  
119 fluorescent marker (first letter) and the promoter driving Cas9 (remaining two letters).

120

121 The CRISPR/Cas9 module of pHEE401E contains two genes, one producing the sgRNA and  
122 one producing the Cas9 mRNA. The CRISPR transcription unit consists of the *Arabidopsis* U6-  
123 26 (At3g13855) polymerase III-dependent promoter, followed by a buffer segment (SpR), a 75  
124 bp sequence encoding the sgRNA scaffold, and the *Arabidopsis* U6-26 terminator. The buffer  
125 segment is designed to be removed by digestion with *BsaI*, a restriction enzyme cutting outside  
126 of its recognition sequence (GGTCTCN<sub>1/5</sub>). *BsaI* digestion leaves incompatible 5'-overhangs  
127 precisely at the transcriptional start site of the sgRNA gene, enabling insertion of a synthetic 19-  
128 20 base pair spacer targeting a gene of interest in a single, technically straightforward cloning  
129 step; larger fragments for expression of multiple sgRNA species may be inserted in a similar  
130 manner (Xing & al., 2014; Wang & al. 2015; Fig 1). No changes were made to this part of the T-  
131 DNA.

132

133 The Cas9 transcription unit of pHEE401E consists of egg cell-specific promoter and enhancer  
134 elements taken from the *Arabidopsis* EC1.1 and EC1.2 genes (At1g76750 and At2g21740)  
135 followed by an open reading frame optimized for maize codon usage (zCas9). Ideally, egg cell-  
136 specific activity of zCas9 would induce mutations very early in embryonic development,  
137 generating primary transgenics that are heterozygous or bi-allelic mutant rather than mosaic  
138 (Wang & al., 2015). However, pHEE401E-derived constructs tended to induce mutations at a  
139 low rate in our hands. We therefore tested an alternative promoter for zCas9, taken from the  
140 *Arabidopsis* polyubiquitin10 gene (At4g05320); this promoter drives robust transcription in a

141 broad range of cell types and is commonly used for gene editing (Ma & al., 2016; Soyars & al.,  
142 2018; similarly, some of the plasmids described in Xiang & al., 2014, contain a maize ubiquitin1  
143 promoter; Fig 1).

144

145 Annotated sequence listings of the six CRISPR/Cas9 T-DNA vectors can be found in the  
146 supporting material (S1 File), and samples of all plasmids have been deposited with Addgene  
147 (see Methods).

148

## 149 **Low-cost LED illumination for detecting bio-fluorescence in** 150 **mature seeds**

151 Ease of use is an attractive feature of bio-fluorescence markers, particularly in the context of  
152 teaching or citizen science; however, commercial fluorescence illuminations can be prohibitively  
153 expensive for such settings. Motivated by a note in 'The Worm Breeder's Gazette' (Chin-Sang  
154 & Zhong, 2008), we explored the performance of high-intensity LED lights and colored-glass  
155 alternative emission filters as a means of providing external epi-fluorescence illumination for  
156 standard dissecting microscopes. We tried six LED assemblies producing relatively narrow  
157 spectra of light with maxima ranging from 415–540 nm in combination with six longpass  
158 emission filters that had cut-off values ranging from 475–610 nm (Fig 2a). Our test sample was  
159 a collection of wild type seeds spiked with a small number of seeds expressing either CFP,  
160 YFP, or Tomato from one of the T-DNAs described above (Fig 2b). As a benchmark, we  
161 imaged the same sample using an Olympus SZX12 stereo-microscope fitted with an internal  
162 fluorescence illumination module (see Methods; YFP was imaged using a GFP filter cube,  
163 Tomato using a propidium iodide filter cube; no appropriate filters were available for CFP).

164

CRISPR/Cas9-mutagenesis of the Arabidopsis GRF family

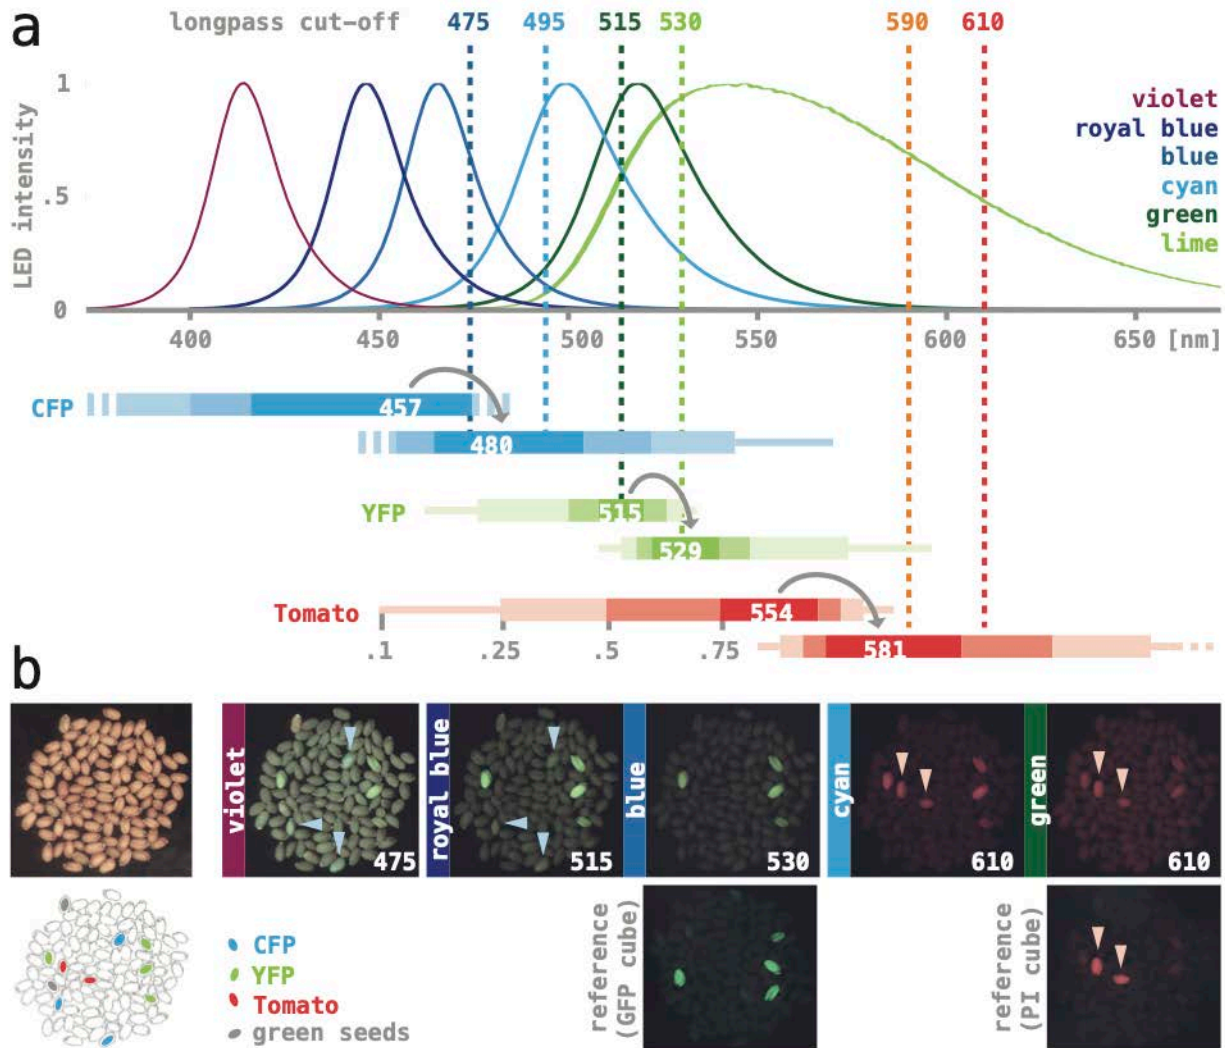

165

166 **Fig 2. LED / coated glass filter illumination for imaging seed fluorescence.**

167 (a) Dotted lines mark the cut-off of longpass colored-glass alternative filters (Newport 20CGA-

168 475, -495, -515, -530, -590, -610; values from [www.newport.com](http://www.newport.com)). Curves show normalized

169 emission spectra of five high-intensity LED assemblies ('violet': Luxeon Star SZ-05-U9, 'royal-

170 blue': -H4; 'blue': -H3; 'cyan': -H2; 'green': -H1; 'lime': -H9; graphs adapted from

171 [www.luxeonstar.com](http://www.luxeonstar.com)). Horizontal bars represent the excitation (top) and emission spectra

172 (bottom) of three fluorescent proteins below (maxima are listed; shaded intervals mark 0.75, 0.5,

173 0.25, and 0.1 of the respective maxima; values from [www.fpbase.com](http://www.fpbase.com); [Lambert, 2019](#)). (b) A

174 sample of control seeds imaged with different illuminations. A bright field image and a trace of



*CRISPR/Cas9-mutagenesis of the Arabidopsis GRF family*

175 the seeds are shown on the left, with the position of CFP-, YFP-, and Tomato-expressing  
176 transgenics, as well as two greenish, chlorophyll-containing seeds highlighted. The LED  
177 assemblies and the cut-off of colored-glass alternative filters used to generate the images are  
178 noted on each panel. Images taken with the benchmark illumination are shown in the bottom  
179 row. Light-blue arrowheads in '475' and '515' point to CFP-expressing seeds, pink arrowheads  
180 in '610' and the PI benchmark point to Tomato-expressing seeds. All fluorescence images were  
181 taken with the same camera settings except for exposure time, which was either 0.5 s (515,  
182 530, GFP benchmark) or 1 s (others).

183

184 Seeds expressing YFP could be readily imaged using 'royal blue' or 'blue' LED lights (~440 nm  
185 and ~470 nm maximum) and 515 nm or 530 nm emission filters (Fig. 2b). These illuminations  
186 produced a brighter background compared to the benchmark, but the overall contrast remained  
187 high. CFP-expressing seeds were best detectable when illuminated with a 'violet' LED light  
188 (~410 nm maximum) combined with a 475 nm emission filter, and Tomato-expressing seeds  
189 when illuminated with 'cyan' or 'green' LED lights (~500 nm and ~520 nm maximum) combined  
190 with 590 nm or 610 nm excitation filters. However, CFP- and Tomato-fluorescence was  
191 significantly dimmer, resulting in low signal-to-noise ratios (Fig. 2b); in addition, the illuminations  
192 were not selective: YFP-expressing seeds often appeared as bright as CFP- or Tomato-  
193 expressing seeds. Remnants of chlorophyll present in a small fraction of the seeds created  
194 relatively strong red fluorescence, in particular when viewed with 'violet' LED lights.

195

196 *Arabidopsis* is most commonly transformed by infiltrating live plants with *Agrobacterium* (Clough  
197 & Brent, 1998), and typically less than a percent of the seeds harvested from treated plants will  
198 be transgenic. As a stringent practical test, we used the benchmark instrument as well as a  
199 standard dissecting scope and LED / colored-glass alternative filter illumination to select primary  
200 transgenic, fluorescent seeds from the same sample collected after *Agrobacterium* infiltration.

## CRISPR/Cas9-mutagenesis of the *Arabidopsis* GRF family

201 For T-DNAs with a YFP marker, more than 80% of the YFP-fluorescent seeds detected with the  
202 benchmark instrument were also detected using illumination with LEDs and colored-glass  
203 alternative filters. For T-DNAs with a Tomato marker, the ratio was much lower (about 20%),  
204 implying that only transformation events resulting in strong Tomato-fluorescence can be reliably  
205 scored (our benchmark instrument was not fitted for imaging CFP, preventing a similar test with  
206 the CFP maker).

207

208 In summary, 'royal-blue' or 'blue' LED lights in combination with 515 nm or 530 nm longpass  
209 emission filters provide effective illumination for imaging YFP fluorescence in seeds. CFP and  
210 Tomato seed fluorescence can be detected using 'violet' and 'cyan' or 'green' LED lights  
211 combined with a 475 nm or 610 nm longpass emission filters, respectively – however, the  
212 sensitivity is comparatively low. Step-by-step instructions for assembling light sources as used  
213 here, including a supplier list and current prices of the components, can be found in the  
214 supporting material ([S2 File](#)).

215

### 216 **Targeting GRF genes individually: Cas9 expression with the** 217 **polyubiquitin promoter results in ten-fold higher mutation** 218 **rates than expression with the EC1 promoter**

219 We chose the nine *Arabidopsis* GROWTH-REGULATING FACTORS (GRFs) as a test-case for  
220 CRISPR/Cas9 mutagenesis with our vectors. GRF genes are found in the genomes of  
221 streptophytes, a phylogenetic group including the land plants and their algal precursors, such as  
222 the charophytes. GRF proteins have two defining structural features: a QLQ domain with the  
223 invariant core of QX<sub>3</sub>LX<sub>2</sub>Q, and a WRC domain with a conserved sequence of three cysteine  
224 and one histidine residues ([Fig.3 a](#); reviewed in [Omidbakhshfard & al., 2015](#); [Kim, 2019](#); it

*CRISPR/Cas9-mutagenesis of the Arabidopsis GRF family*

225 should be noted that the WRC domain does not conform to the consensus of C<sub>3</sub>H zinc-fingers,  
226 since the conserved positions show different spacing; Wang & al., 2008). GRFs are known to  
227 associate with GRF-INTERACTING FACTORS (GIFs) and to bind DNA in a sequence-specific  
228 manner. A phylogenetic analysis reveals that the *Arabidopsis* GRF genes fall into five clades,  
229 all of which were already present in the last common ancestor of flowering plants (Fig. 3 b;  
230 Omidbakhshfard & al., 2015). GRF5/GRF6 and GRF7/GRF8 were separated in a whole  
231 genome triplication event at the base of the eudicots (~130 million years ago; Jiao & al., 2012);  
232 GRF1/GRF2 and GRF3/GRF4 reside on large syntenic blocks (PPGD database,  
233 chibba.agtec.uga.edu/duplication; Lee & al., 2012) and were separated in the alpha whole  
234 genome duplication (~30 million years ago, before the split of *Arabidopsis* and *Brassica*; Vision  
235 & al., 2000; Ermolaeva & al., 2003). Insertion alleles have been reported for all GRFs with  
236 exception of GRF6 (Fig 3 a); however, in many cases the insertion sites are in the promoter, in  
237 introns, or downstream of the WRC motif, and it is not clear that gene function is completely  
238 abolished. According to expression data in the public domain, GRF transcripts appear to  
239 accumulate predominantly in tissues with high mitotic rates, such as in the shoot apical  
240 meristem (SAM) and reproductive organs (Fig. 3 b; data taken from Klepikova & al., 2016; see  
241 Lee & al., 2018, for expression of GRF reporter genes in inflorescences).  
242

CRISPR/Cas9-mutagenesis of the *Arabidopsis* GRF family

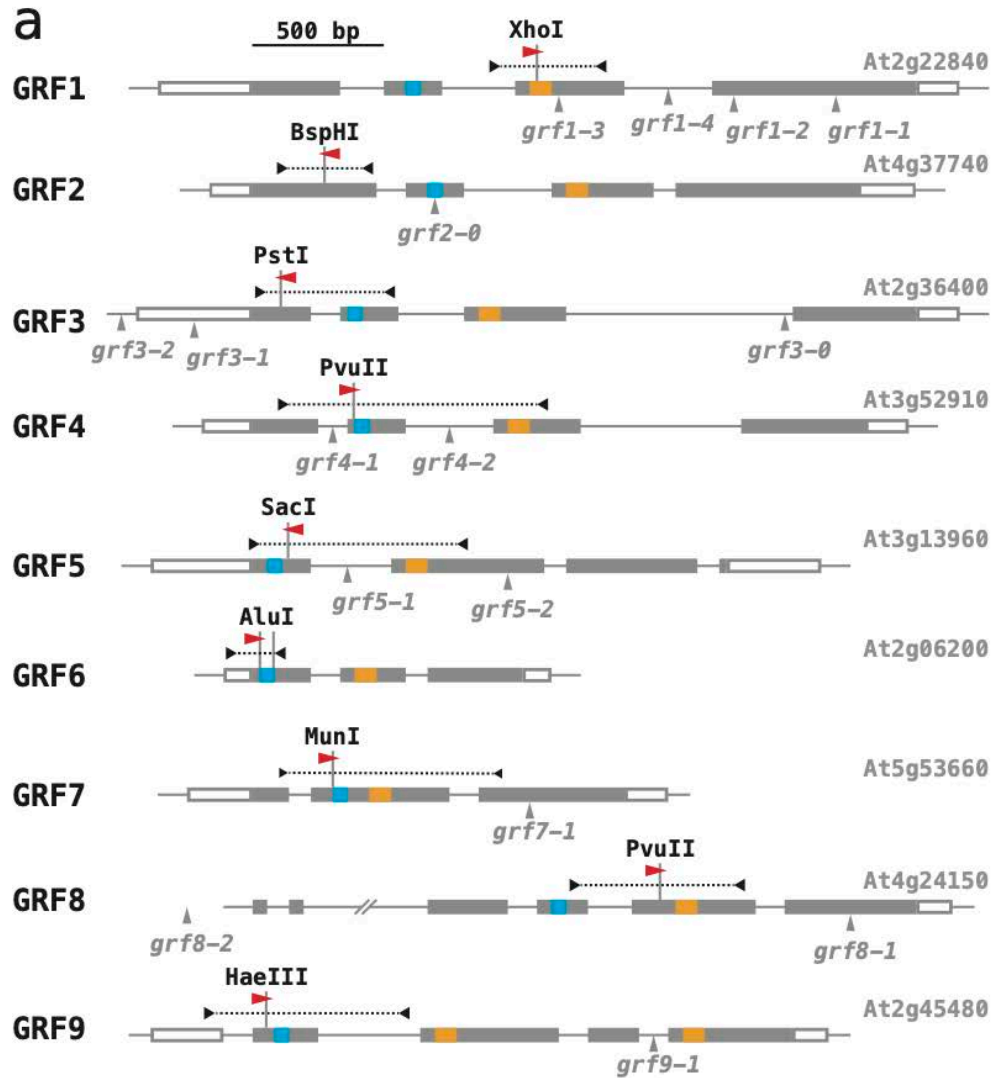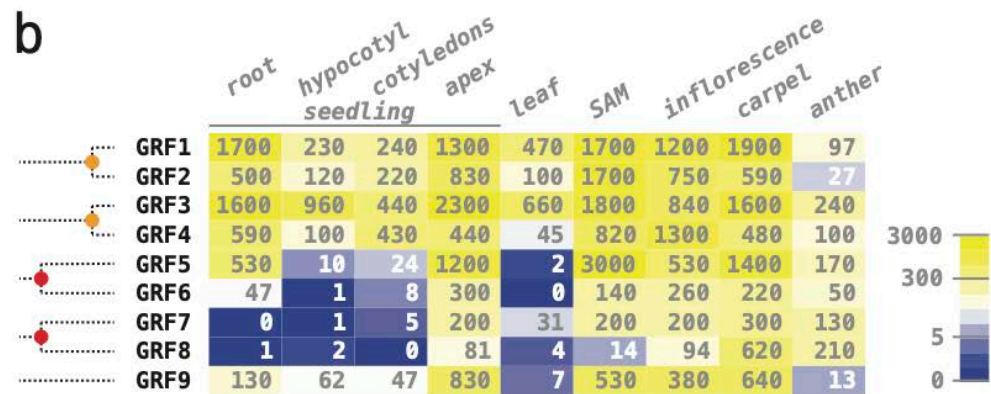

243

244

**Fig 3. The GROWTH-REGULATING FACTOR (GRF) gene family of *Arabidopsis*.**

245

(b) Schematic organization of the *Arabidopsis* GRF genes (aligned at the translational start

246

site). Exons are shown as boxes, with coding sequences filled in grey, the QLQ motif in blue,

*CRISPR/Cas9-mutagenesis of the Arabidopsis GRF family*

247 and the WRC motif in orange. The position and direction of protospacer sequences are  
248 indicated by a red arrowhead, with the targeted restriction sites shown above and the gene  
249 fragments that were amplified to screen for induced mutations as dotted lines. All previously  
250 reported GRF alleles are due to T-DNA insertions, mapped below the gene models; they are  
251 described in: [Kim & al. \(2003\)](#), *grf1-1*, *grf1-2*, *grf2-0*, *grf3-0*; [Horiguchi & al. \(2005\)](#), *grf5-1*, *grf9-*  
252 *1*; [Kim & Lee \(2006\)](#), *grf4-1*; [Hewezi & al. \(2012\)](#), *grf1-3*, *grf1-4*, *grf3-1*, *grf3-2*; [Kim & al., \(2012\)](#),  
253 *grf7-1*, *grf8-1*, *grf8-2*; [Lee & al. \(2018\)](#), *grf5-2*). (b) Overview of GRF mRNA expression (from  
254 [travadb.org](http://travadb.org); [Klepikova & al., 2016](#)). Numbers represent the normalized average count per  
255 million reads; note that the scale of the color scheme is logarithmic. Samples of 'seedlings'  
256 were collected one day after germination; 'apex' represents the shoot meristem and surrounding  
257 tissues; 'leaf' represents the third rosette leaf at the time of flower opening; 'SAM' represents the  
258 vegetative shoot apical meristem 8 days after germination; 'carpels' and 'anthers' were  
259 harvested at the time of flower opening. Phylogenetic relationships of the *Arabidopsis* GRF  
260 genes are sketched on the right side (after [Omidbakhshfard & al., 2015](#)): the five GRF sub-  
261 clades found in *Arabidopsis* date back to before the last common ancestor of flowering plants;  
262 the alpha whole genome duplication event (~30-35 million years ago) is marked by an orange  
263 dot, the gamma triplication event at the base of the eudicots (~120 million years ago) by a red  
264 dot.

265  
266 We followed two criteria for selecting specific spacer sequences targeting individual GRF genes  
267 from the CRISPR-Plant database ([www.genome.arizona.edu/crispr2](http://www.genome.arizona.edu/crispr2); [Xie & al., 2014](#)): first, the  
268 spacers had to target an exon upstream of the WRC motif, such that induced alleles would likely  
269 be nulls; second, the predicted Cas9 cut site had to lie within the recognition sequence of a  
270 restriction enzyme, such that induced mutations could be detected by PCR and restriction digest  
271 ([Fig 3b](#); spacer sequences are listed in [S3 File](#)). Annealed oligonucleotides encoding the  
272 selected spacer sequences were then inserted into T-DNA vectors expressing Cas9 from either

CRISPR/Cas9-mutagenesis of the Arabidopsis GRF family

273 the EC1 or the UBI10 promoter. For each construct, ~25 T1 seedlings were selected and their  
 274 DNA was tested for mutant sectors; samples were scored as positive if ~50% or more of the  
 275 PCR product remained uncut after restriction digest (see Fig 4a for an example).  
 276

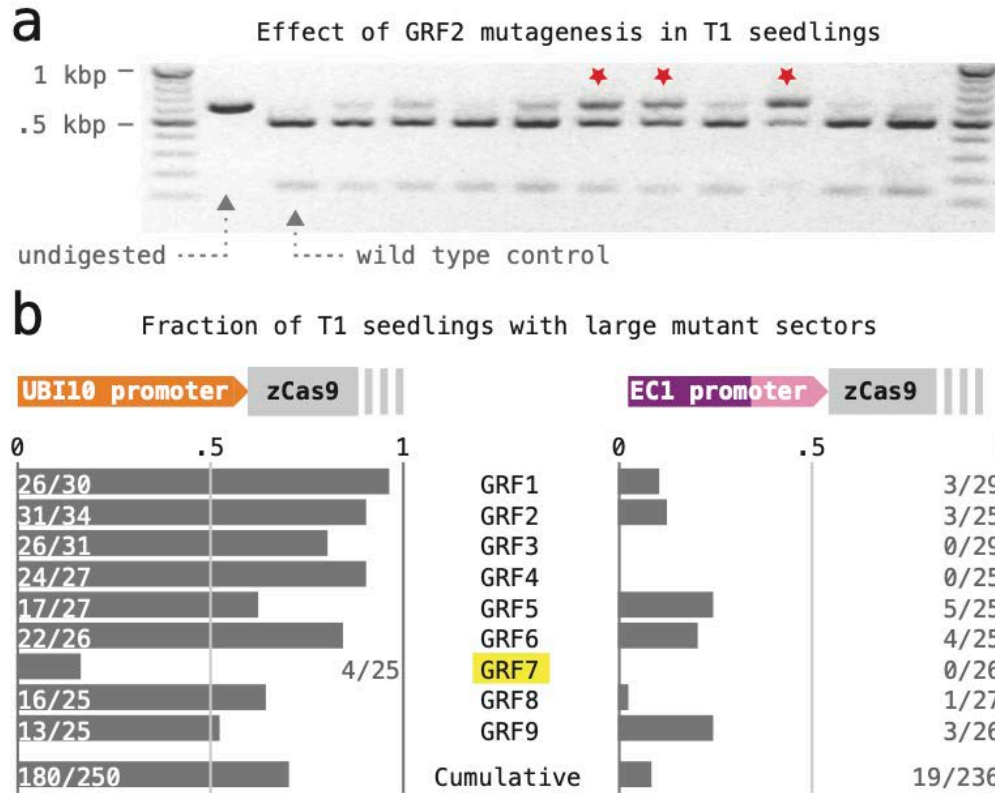

277

278 **Fig 4. CRISPR/Cas9 mutagenesis with constructs expressing a single sgRNA.**

279 (a) The rate of induced mutations was estimated based on the occurrence of large mutant  
 280 sectors in the T1 generation. Results for 11 T1 seedlings transformed with a construct  
 281 expressing Cas9 from the EC1 promoter are shown as an example; the red stars mark cases  
 282 where about half or more of the total DNA was undigested – these cases were scored as  
 283 positive. (b) Cas9 apoprotein was expressed either from the polyubiquitin10 (UBQ10, left) or  
 284 the egg cell-specific EC1 promoter (right). Estimated mutation rates are listed below.

285

*CRISPR/Cas9-mutagenesis of the Arabidopsis GRF family*

286 The frequency of seedlings with large mutant sectors was taken as a proxy for the rate of  
287 CRISPR/Cas9-induced mutations at the nine GRF loci (Fig 4b). Our results reveal that  
288 expression of Cas9 with the polyubiquitin10 promoter caused almost ten-fold higher overall  
289 mutation rates than expression of Cas9 with the EC1 promoter (UBI10: 0.72, n=250; EC1:  
290 0.058, n=236). By comparison, the mutation rates at different target loci (induced by different  
291 sgRNAs) showed much less variability: when Cas9 was expressed from the UBI10 promoter,  
292 frequencies of greater than 50% were obtained for all GRFs except GRF7. The GRF7 sgRNA  
293 also performed poorly when Cas9 was expressed from the EC1 promoter.

294

295 **A collection of reference null-alleles for the *Arabidopsis* GRF**  
296 **family**

297 We next examined the germline transmission of CRISPR/Cas9-induced mutations (Fig 5). For  
298 each target locus, ~10 T1 plants were grown to maturity and tested for mutant sectors using  
299 DNA extracted from rosette leaves or the primary inflorescence; sectored plants were allowed to  
300 self-fertilize and their seed harvested; ~3-6 non-fluorescent, transgene-free T2 seed per positive  
301 T1 line were then propagated on soil, and the resulting plants assayed again. Despite this small  
302 sample size, mutant alleles were recovered in most GRF genes (GRF1: 3 alleles from 3 T1,  
303 testing 3 T2 each; GRF3 & GRF4: 2 alleles from 3 T1, testing 3 T2 each; GRF5 & GRF6: 3  
304 alleles from 7 T1, testing 3 T2 each); only with GRF7 and GRF8 was it necessary to examine  
305 the progeny of more than 10 T1 plants.

306

CRISPR/Cas9-mutagenesis of the *Arabidopsis* GRF family

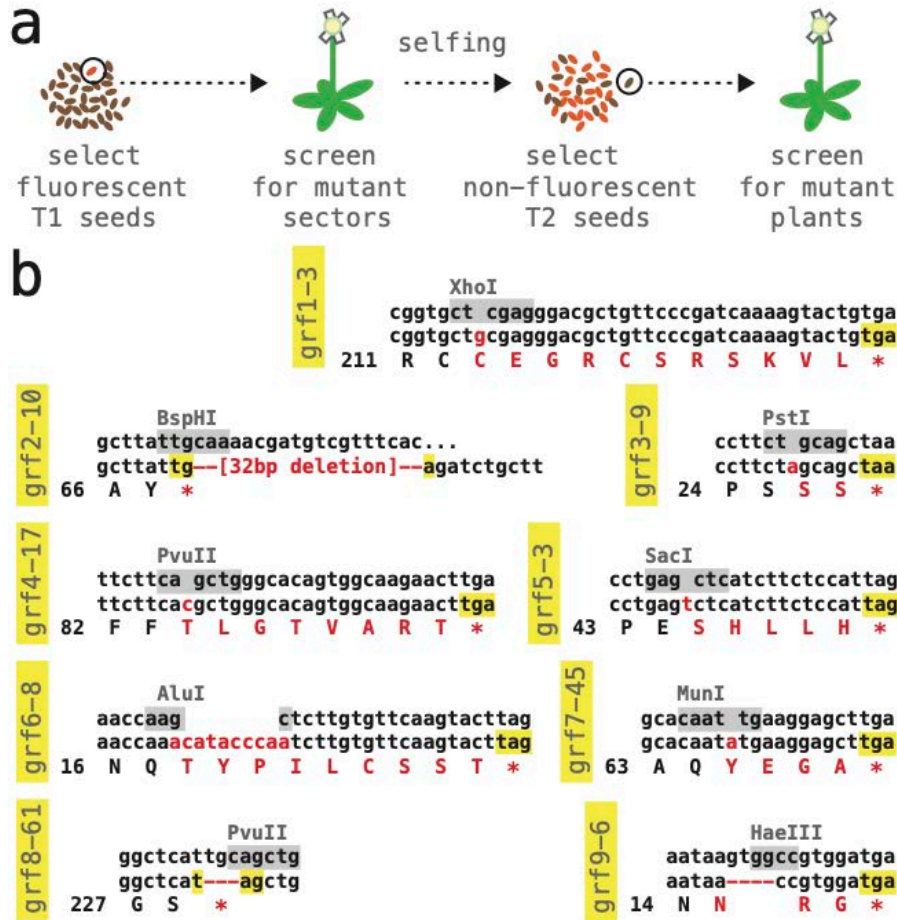

307

308 **Fig 5. Collection of reference null alleles in *Arabidopsis* GRF genes.**

309 (a) Selection and counter-selection scheme for identifying CRISPR/Cas9-induced mutations;

310 see text for details. (b) Molecular lesions of reference alleles. The wild type DNA sequence

311 surrounding the CRISPR/Cas9 cut site is listed on top, with restriction site used to identify

312 mutations highlighted in grey; the middle and bottom row show the DNA and predicted protein

313 sequence of the mutant allele; inserted or deleted nucleotides as well as amino acid changes

314 are shown in red. All alleles are predicted to cause a premature stop (highlighted in yellow).

315

316 Stably transmitted GRF alleles were also identified in the non-transgenic progeny of ~10-20 T1

317 plants that had been bulk-harvested blindly, without screening for mutant sectors (GRF2: 3

318 alleles, testing 10 T2 from a pool of 10 T1; GRF8: 1 allele, testing 20 T2 from a pool of 10 T1;



## CRISPR/Cas9-mutagenesis of the *Arabidopsis* GRF family

319 GRF9: 5 alleles, testing 20 T2 from a pool of 10 T1). While this simpler protocol may reduce  
320 time and effort in large-scale experiments, it is less well controlled and showed no substantial  
321 benefits in our case.

322

323 Sanger sequencing of the induced mutations revealed that the vast majority were due to small  
324 insertion/deletion events at the predicted CRISPR/Cas9 cut sites. From this collection, we  
325 selected *bona-fide* null alleles in all nine *Arabidopsis* GRF genes (Fig 5b). Homozygous single  
326 mutant plants could be obtained with all these reference alleles and showed no obvious  
327 abnormalities. Seed samples are available from the *Arabidopsis* stock center (see Methods).

328

329 **Targeting pairs of GRF genes: similar mutation rates were**  
330 **obtained by expressing two sgRNAs as independent genes**  
331 **or as part of one polycistronic gene including a tRNA buffer**

332 Plants simultaneously expressing more than one sgRNA species have been produced by  
333 placing independent sgRNA genes on a single T-DNA or, alternatively, by constructing a  
334 polycistronic transcription unit, in which segments encoding sgRNAs alternate with segments  
335 encoding a tRNA; the cellular tRNA processing machinery will excise these tRNA segments  
336 post-transcriptionally, liberating the sgRNAs (Xie & al., 2015). We have directly compared the  
337 efficiency of these two designs by generating T-DNAs targeting pairs of GRF genes (GRF1/2,  
338 GRF3/4, GRF5/6, and GRF7/8) either with sgRNAs expressed from separate promoters (U2-26,  
339 At3g13855; U6-29, At5g46315) or with sgRNAs derived from a polycistronic transcript (Fig 6).  
340 DNA fragments encoding the respective combinations were produced by PCR with primer  
341 combinations that included the gene-specific spacer sequences as well as terminal *BsaI* sites  
342 (as in Xing, & al., 2014; a plasmid containing the U6-29 promoter and a synthetic DNA fragment

CRISPR/Cas9-mutagenesis of the Arabidopsis GRF family

343 containing an alanine tRNA sequence served as templates; see Methods and **S3 File** for  
 344 details). The sgRNAs contained the same gene-specific spacer sequences as previously, and  
 345 all constructs were based on vectors driving Cas9 expression from the UBI10 promoter.

346

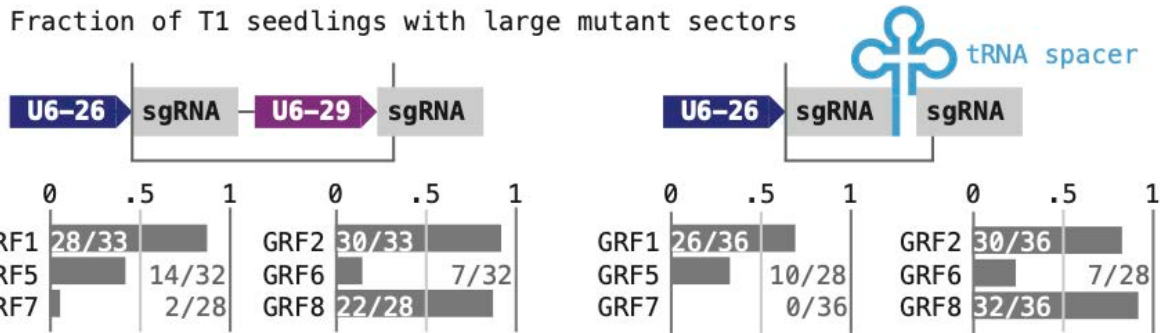

347

348 **Fig 6. CRISPR/Cas9 mutagenesis with constructs expressing two sgRNAs.**

349 Different combinations of two sgRNA species were expressed either from separate genes (top  
 350 left) or from a polycistronic gene with a tRNA buffer (top right); DNA fragments inserted into the  
 351 *BsaI* cloning site of the vector boxed; 'U6-26' and 'U6-29', small RNA promoters. Estimates of  
 352 the mutation rates at target genes are shown below, with the targets listed as the sgRNAs were  
 353 arranged on the constructs.

354

355 Two attempts at transforming T-DNAs targeting GRF3/4 failed to produce fluorescent T1 seeds,  
 356 suggesting that this combination of sgRNAs may be detrimental to transformed cells. T1  
 357 seedlings harboring the remaining three pairs of constructs were assayed for large mutant  
 358 sectors as before. Averaged over all target genes, the mutation rates in this experiment  
 359 seemed slightly lower than the rates observed with single sgRNAs; but they were not dependent  
 360 on how the sgRNA species were generated (**Fig 6**; independent promoters: 0.55, n=186;  
 361 separated by tRNA: 0.52, n=200; compared to 0.72, n=250, when targeted individually), nor was  
 362 there an apparent correlation of the mutation rate to the position of an sgRNA on the construct  
 363 (GRF1, GRF5, GRF7: 0.57, n=82, when targeted individually; 0.41, n=193, when targeted as

*CRISPR/Cas9-mutagenesis of the Arabidopsis GRF family*

364 part of a pair; GRF2, GRF6, GRF8: 0.81, n=85, when targeted individually; 0.61, n=118, when  
365 targeted as part of a pair). Loci showing the highest mutation rates when targeted individually  
366 also showed the highest rates when targeted as part of a pair. Interestingly, mutations in the  
367 two members of a pair did not arise independently: the large majority of all T1 seedlings either  
368 tested wild type at both target genes (55) or harbored mutant sectors in both (70); the remaining  
369 seedlings showed large sectors only at the target with a higher overall mutation rate (68; n=193,  
370 combined data for both types of constructs). These findings imply that CRISPR/Cas9 activity in  
371 our experiment varied more substantially between transgenic lines than it did between  
372 complexes containing different sgRNA species.

373

374 **Simultaneous targeting of the entire gene GRF family:**  
375 **multiplexing of four or more CRISPR RNAs results in vastly**  
376 **different mutation rates at different target genes**

377 Finally, we explored multiplexing sgRNAs as a means of creating multiple mutant combinations  
378 in a moderate number of target loci. To minimize repetitive sequences in the constructs, we  
379 combined the multiplexing approaches assessed above: two small RNA genes driven by a U6-  
380 26 and a U6-29 promoter, respectively, were arranged in tandem; each gene produced a poly-  
381 cistronic transcript encoding two sgRNAs separated by an alanine tRNA (Fig 7a). Construct  
382 '1256' had a Tomato selectable marker and targeted GRF1, GRF2, GRF5, and GRF6; construct  
383 '3478' had a YFP selectable marker and targeted GRF3, GRF4, GRF7 and GRF8 (see Methods  
384 and S3 File for details).

385

CRISPR/Cas9-mutagenesis of the Arabidopsis GRF family

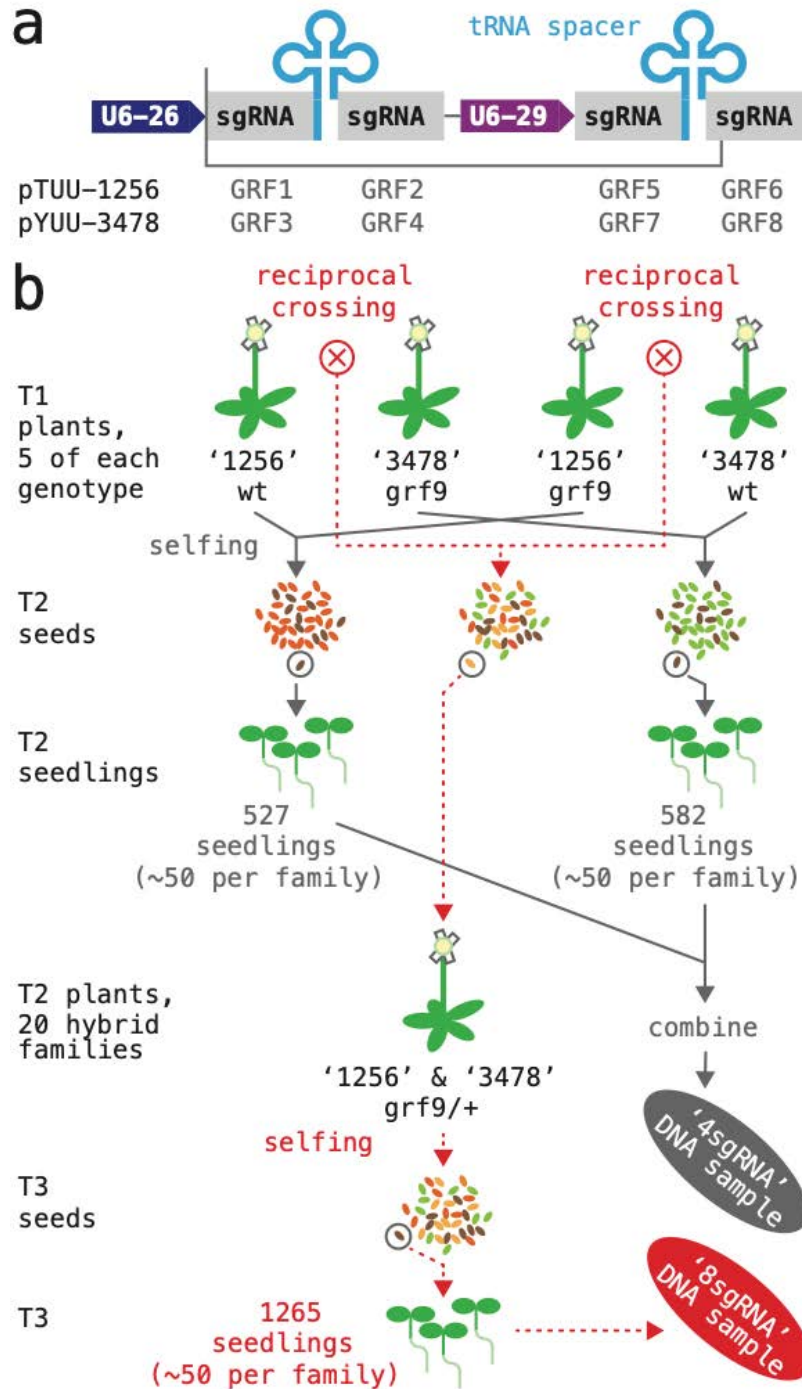

386

387 **Fig 7. Simultaneous CRISPR/Cas9 mutagenesis of four and eight GRF genes.**

388 (a) A schematic of the two T-DNA constructs expressing four sgRNA species are shown on top;

389 DNA fragments inserted into the *BsaI* cloning site of the vector boxed; 'U6-26 and U6-29', small

390 RNA promoters. (b) Flow-chart illustrating how the two DNA samples for amplicon sequencing

*CRISPR/Cas9-mutagenesis of the Arabidopsis GRF family*

391 were generated. The '4sgRNA' sample (grey arrows) represents plants that had been subjected  
392 to mutagenesis by either the '1256' or the '3478' construct; for each construct, 10 T1 plants  
393 were grown to maturity and harvested; ~50 transgene-free seeds per T1 plant were germinated  
394 and combined for DNA extraction. The '8sgRNA' sample (dotted red lines) represents plants  
395 that had been subjected to mutagenesis by both constructs; reciprocal crosses between pairs of  
396 '1256' and '3478' T1 plants were performed (total of 20 crosses), and T2/F1 plants containing  
397 both constructs selected; ~50 transgene-free seeds per T3/F2 family were germinated and  
398 combined for DNA extraction.

399

400 The two T-DNAs were used to generate populations of plants in which either four or eight GRF  
401 genes were being mutagenized; in addition, the plants were segregating for the *grf9-6* reference  
402 allele (GRF9 was not targeted by the any of the T-DNAs; Fig 7b). Toward this, both constructs  
403 were transformed separately into wild type as well as *grf-9-6* mutant plants. For each  
404 combination, five T1 plants that contained a large mutant sector in at least one of the target  
405 genes were then selected, allowed to self-pollinate, and harvested – yielding 20 families of T2  
406 seeds. In addition, reciprocal crosses were performed between the five wild type plants  
407 harboring the '1256' transgene and the five *grf9-6* plants harboring the '3478' transgene (total of  
408 10 crosses), as well as the five *grf9-6* plants harboring the '1256' transgene and the five wild  
409 type plants harboring the in the '3478' transgene (total of 10 crosses). From each cross, ~5 T2  
410 / F1 seed showing Tomato- as well as YFP-fluorescence were propagated; the resulting plants  
411 (*grf9-6*+, hemizygous for both constructs, representing 20 independent transformation events)  
412 were allowed to self-pollinate and harvested – yielding 20 families of T3 seeds.

413

414 The frequency of GRF mutations induced by the '1256' or '3478' constructs either separately or  
415 in combination was then estimated by amplicon-sequencing. Two samples of pooled DNA were  
416 prepared for this purpose: the '4sgRNA' sample represented a population in which four genes

*CRISPR/Cas9-mutagenesis of the Arabidopsis GRF family*

417 were targeted simultaneously (grey in Fig 7b; 527 and 582 seedlings produced by T1 plants  
418 harboring '1256' and '3478', respectively; ~50 seedlings per family; half of the T1 parents were  
419 *grf9-6*); the '8sgRNA' sample represented a population in which eight genes were targeted  
420 simultaneously (red in Fig 7a; 1265 seedlings total, ~50 per family; all T2 parents were *grf9-6/+*).  
421 Selection of non-fluorescent seeds ensured that, barring sampling errors, our samples only  
422 contained germline-transmitted mutations. A small number of seedlings with known mutations  
423 in GRF9 was added to both samples for control purposes (see Methods).

424

425 DNA fragments covering the predicted CRISPR/Cas9 cut sites at all nine GRF genes were  
426 generated by PCR, barcoded, and sequenced on an Illumina platform (see Methods and S3 File  
427 for details). On average, >95% of the resulting reads mapped to their amplicon, and the  
428 number of reads expected to be generated by one GRF allele of one seedling in the sample was  
429 ~46 (between ~23 and ~56; see Methods for summary statistic and representation of controls  
430 included in the samples). We used the AGEseq tool (Analysis of Genome Editing by  
431 sequencing; Xue & Tsai, 2015) to determine the frequency of small deletions or insertions in the  
432 DNA samples (Fig 8; transitions and transversions were not considered, since they are not  
433 commonly induced by CRISPR/Cas9 and can be difficult to distinguish from PCR or sequencing  
434 artifacts; deletions of ~100 bp or greater, which are more common, would have escaped our  
435 analysis). Nearly all lesions mapped exactly to the predicted CRISPR/Cas9 cut site; in the  
436 remaining cases (grey dots in Fig 8), the mutations mapped only one to two positions off. The  
437 most common types of lesion were single base pair insertions, and deletions of one or two base  
438 pairs. Five relatively long insertions, ranging from 15 to 55 bp, were also represented in our  
439 collection (Fig 8); while two of these insertions originated from the mutagenized GRF locus, we  
440 were unable to determine the origins of the remaining three). Although different target genes  
441 showed slightly different spectra of lesions, we saw no evidence for microhomology-based  
442 repair at the CRISPR/Cas9 cut site (as discussed in Vu & al., 2017; Sfeir & Symington, 2015).



CRISPR/Cas9-mutagenesis of the Arabidopsis GRF family

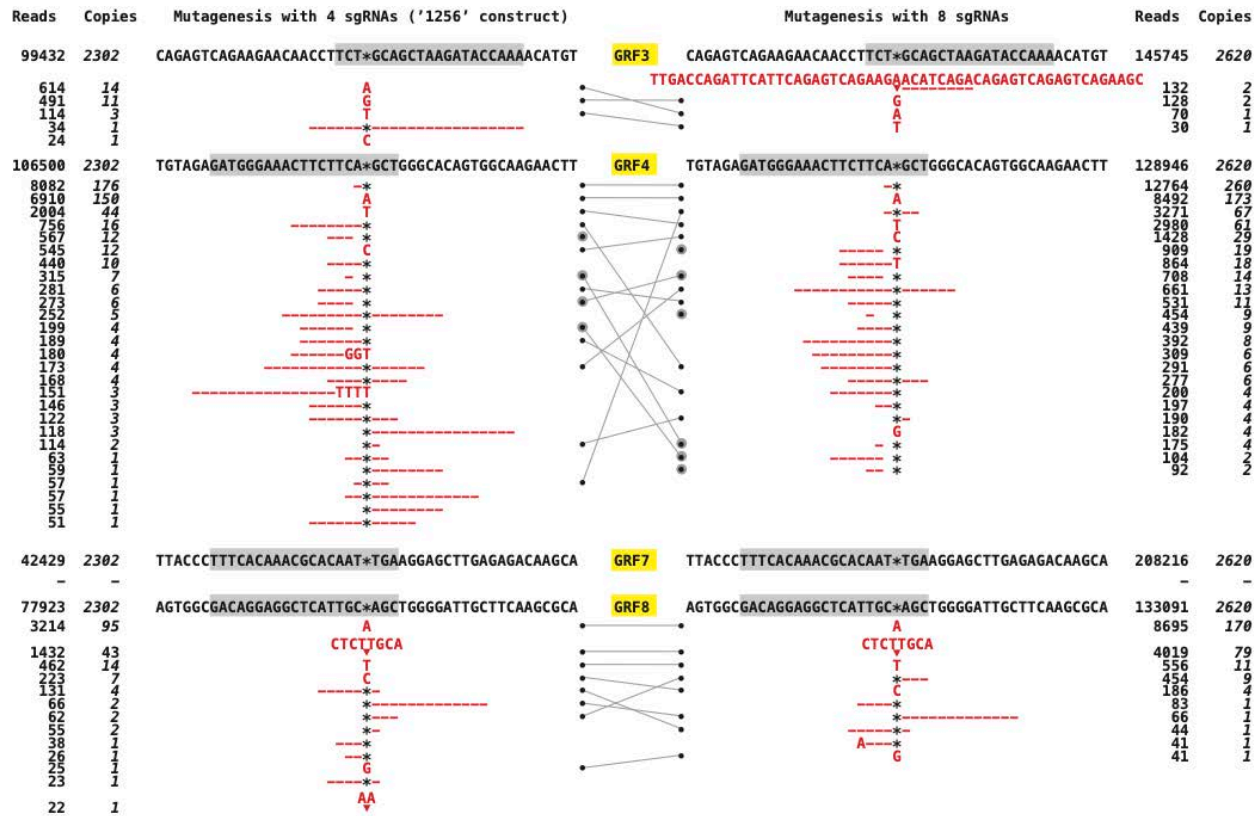

445

446 **Fig 8: Spectrum of CRISPR/Cas9-induced mutations at different target genes.**

447 Spectrum and frequency of insertion-deletion events identified by AGEseq in GRF target genes.

448 Targets are arranged according to their position on the '1256' or '3478' constructs, protospacer

449 sequences are highlighted in grey, and the predicted Cas9 cut site is represented by a star.

450 The total number of mapped reads supporting an allele is listed under 'reads', and the estimated

451 number of seedlings in the pool that are heterozygous for the allele is shown in cursive under

452 'copies' (see Methods). Alleles that were found in both DNA pools are marked with a black dot

453 and connected by grey lines; these alleles may not have been induced independently, since the

454 same T1 plants gave rise to both pools. Grey dots mark alleles in which the predicted

455 CRISPR/Cas9 cut site is not part of the lesion. The 35 bp insertion in GRF2 (GATGTC...) and

456 the 16 bp insertions in GRF6 two alleles (TGAAAA...) originate from within the gene.

457



*CRISPR/Cas9-mutagenesis of the Arabidopsis GRF family*

458 The overall effects of the two constructs did not vary much between our two populations: the  
459 target genes of '1256' were mutated with an average frequency of ~32% when the construct  
460 was acting by itself and ~29% when acting in combination with '3478'; for the '3478' construct,  
461 the corresponding values were ~7% and ~10%. This observation implies an additive  
462 interaction on average (possibly because the average ratio of Cas9 apoprotein to total sgRNA  
463 remains constant). The perhaps most striking result of the experiment was that mutation  
464 frequencies at individual target genes were vastly different and often strongly affected by  
465 multiplexing. A compilation of the estimated mutation rates gathered in all our experiments  
466 reveals that multiplexing sgRNAs drastically reduces the frequency of CRISPR/Cas9-induced  
467 lesions at some target genes, while showing only small effects at others (Fig 9; rates were  
468 normalized to GRF2, which showed the highest values in all experiments; see legend for  
469 details). When tested individually, all sgRNAs (except for the one targeting GRF7) were roughly  
470 similarly effective, producing large mutant sectors in greater than 50% of the T1 seedlings. The  
471 GRF2 sgRNA continued to induce mutations at consistently high rates: 95% by itself; 87% in  
472 combination with a GRF1 sgRNA; 73% and 75% when combined with three or seven other  
473 sgRNA species, respectively. In contrast, the mutation rates associated with the majority of  
474 sgRNAs show a more or less steep downward trajectory with increasing number of total sgRNA  
475 species, implying that multiplexing successively and more or less drastically reduces the activity  
476 of these sgRNAs.  
477

*CRISPR/Cas9-mutagenesis of the Arabidopsis GRF family*

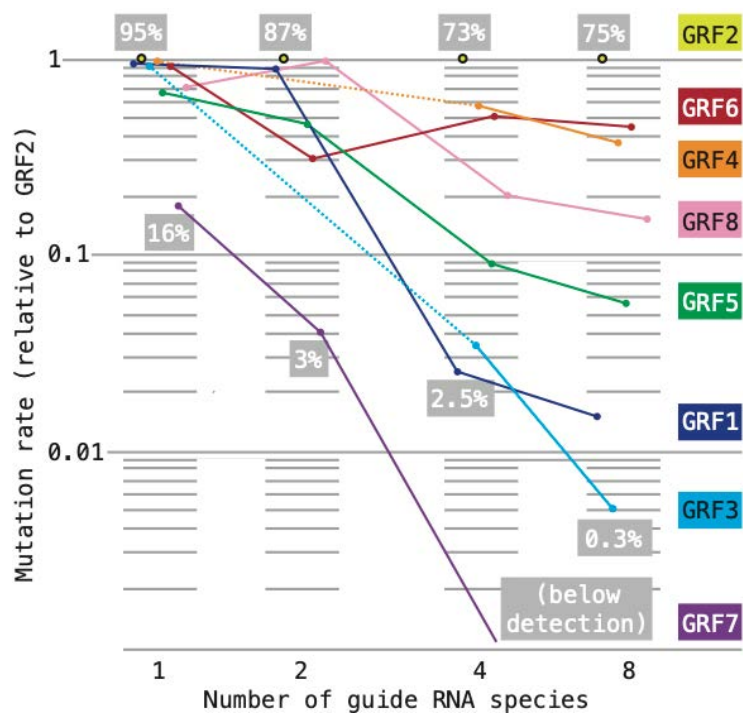

478

479 **Fig 9: Effect of sgRNA multiplexing on mutation rates at different target loci.**

480 Our estimates of mutation rates are not directly comparable: in experiments with one or two  
481 sgRNAs, we assessed the frequency of large mutant sectors in ~24 T1 seedlings; in  
482 experiments with four or eight sgRNAs, we assessed the frequency of germline-transmitted  
483 mutant alleles in ~1000 seedlings. Throughout, the most effective sgRNA was the one targeting  
484 GRF2. For the purpose of comparison, the mutation rates estimated in each experiment were  
485 normalized to GRF2 (set to '1' on the y-axis; note that the scale is logarithmic); the number of  
486 sgRNA species in the experiment is listed on the x-axis. To convey the range of mutation  
487 frequencies within each experiment, the highest and lowest observed values are listed in the  
488 grey boxes (expressed as percentage of the total sample).

489

## 490 Discussion

491

*CRISPR/Cas9-mutagenesis of the Arabidopsis GRF family*

492 A large variety of binary vectors is available for targeted mutagenesis in plants. Here, we add  
493 vectors enabling selection and counter-selection of transgenes on the basis of seed bio-  
494 fluorescence to the toolbox of CRISPR/Cas9 plasmids created by Xing & al. (2014) and Wang &  
495 al. (2015). The value of fluorescent markers for removing CRISPR/Cas9 transgenes once they  
496 are no longer needed has been recognized previously (Gao & al., 2016; Wu & al., 2018);  
497 however, the T-DNAs described by these groups were designed for large-scale experiments  
498 and rely on Gibson assembly for a high-throughput construction pipeline. In contrast, the  
499 vectors we describe here are suited for small-scale projects and minimal lab settings:  
500 construction relies on standard molecular cloning routines that require no specialized equipment  
501 or reagents; *Bsa*I-cut vector fragments may be prepared in advance and stocked; plasmids  
502 expressing one sgRNA are generated by combining the vector with annealed synthetic  
503 oligonucleotides – as rapid, simple, and cheap a cloning procedure as we know; finally,  
504 transgenic seeds can be easily identified by illumination with inexpensive LED lights and  
505 colored-glass alternative filters. We tested these tools on the *Arabidopsis* GRF genes and  
506 recovered new reference alleles with frame-shift mutations truncating the predicted protein  
507 sequences before or within the conserved WRC domain for all nine members of the family with  
508 small effort (~30 PCR-based tests in most cases). With exception of the GRF7 sgRNA, all  
509 guides caused high rates of induced mutations when expressed individually (although they were  
510 selected from a large database without regard to sequence composition or secondary structure).  
511  
512 A convenient method for simultaneously mutagenizing multiple loci would greatly simplify the  
513 genetic analysis of functional redundancies, and several platforms for multiplexing CRISPR  
514 RNAs in plants have been developed with this aim in mind (reviewed in Najera & al., 2019). Ma  
515 and colleagues (2015) simultaneously targeted eight rice FT-like genes and recovered primary  
516 transgenic seedlings with mutations in seven of the targets. These multiple mutant plants  
517 showed visible phenotypes consistent with a loss of FT-like function, but it was not reported

*CRISPR/Cas9-mutagenesis of the Arabidopsis GRF family*

518 whether the induced mutations were transmitted to the next generation. Xie and colleagues  
519 (2015) simultaneously targeted five rice MAP kinase genes and found that ~50% of the primary  
520 transgenics harbored editing events in all targets (again, it was not reported whether the  
521 mutations were heritable). Following similar overall procedures as we, Zhang and colleagues  
522 (2016) targeted six *Arabidopsis* PYR1-like genes and identified one primary transgenic plant  
523 (out of 15) that contained mutations in all of them; importantly, the mutations were germline-  
524 transmitted and enabled construction of a sextuple mutant.

525

526 In contrast to these studies, our experiments enabled us to trace the trajectory of mutation rates  
527 at different GRF targets in plants expressing a single, two, four and eight sgRNA species. The  
528 results revealed strong interference effects: while some targets always showed lesions with a  
529 high frequency, the mutation rate at most targets dropped, often drastically, as the number of  
530 sgRNA species increased. This effect could be caused by synthetic lethality or similarly strong  
531 interactions between induced alleles. Such interactions are often seen with mutations in closely  
532 related genes that can provide overlapping function. Phylogeny indicates that the gene pairs  
533 GRF1/GRF2, GRF3/GRF4, GRF5/GRF6, and GRF7/GRF8 arose in duplication events within  
534 flowering plant lineage (Fig. 3), and it does not seem unlikely that the two genes of a pair retain  
535 similar activities. Multiplexing appeared to affect the two members of a pair in markedly  
536 different ways: while one of the genes (GRF2, GRF4, GRF6, GRF8) retained relatively high  
537 mutation rates, rates dropped sharply in the other (GRF1, GRF3, GRF5, GRF7; Fig. 9). This  
538 apparent dichotomy is consistent with the idea that double mutant gametophytes or sporophytes  
539 are impaired or inviable. Our constructs simultaneously targeting two GRF genes revealed that  
540 CRISPR/Cas9-induced mutations do not arise independently; rather, it appears that mutations  
541 induced by the less effective sgRNA predominantly arise concomitantly with mutations induced  
542 by the more effective sgRNA. Since we assessed apparent mutation rates at the seedling  
543 stage, this asymmetry would explain how the loss of double mutant genotypes due to synthetic

*CRISPR/Cas9-mutagenesis of the Arabidopsis GRF family*

544 lethality may affect one gene of a pair much more dramatically than in the other. On the other  
545 hand, a survey of more than 1000 individuals derived from plants that were harboring the ‘1256’  
546 as well as ‘3478’ constructs and were heterozygous for the *grf9-6* reference allele (the same  
547 plants that gave rise to the seedlings analyzed in your amplicon sequencing experiment)  
548 uncovered only a single line segregating for embryo-lethality and no lines with an obviously  
549 defective female gametophyte (male gametophytes were not examined). Similarly, multiple  
550 mutants of previously described GRF insertion alleles show only mild defects ([Kim & al., 2003](#);  
551 [Horiguchi et al., 2005](#); [Kim & Lee, 2006](#); [Hezewi & al., 2012](#); [Lee & al., 2018](#)), such that there is  
552 little evidence for pervasive and strong detrimental interactions between GRF mutations.

553

554 A second factor influencing the trajectory of mutation rates appears to be inherent to the  
555 CRISPR/Cas9 machinery: multiplexing tends to amplify relatively small differences in the  
556 baseline activity of individual sgRNAs (assessed in the absence of other sgRNA species). An  
557 analogous, although less pronounced interference-effect upon multiplexing was observed in rice  
558 protoplasts and attributed to competition of sgRNAs for a limiting amount of Cas9 apoprotein  
559 ([Xie & al., 2015](#)). Any such competition would be exacerbated in our case, as multiplexing  
560 likely increases the relative abundance of sgRNAs with respect to Cas9 apoprotein: constructs  
561 targeting two or four GRF genes can potentially produce two or four times the amount of  
562 sgRNAs compared to constructs targeting a single gene (assuming similar activity of the two U6  
563 promoters and no substantial losses in transcript processing). The idea that Cas9 abundance  
564 often limits genome editing events in plants is not new. [Osakabe and colleagues \(2016\)](#)  
565 reported that the accumulation of Cas9 apoprotein varied widely between independent  
566 transgenic lines and was well-correlated with the occurrence of induced mutations. Indeed, this  
567 effect is so strong that it has prompted the incorporation of ‘target-proxies’, fluorescent markers  
568 that include a target mimic, into CRISPR/Cas T-DNAs as a means of selecting transformation  
569 events with robust CRISPR/Cas9 activity ([Li & al., 2020](#)). Finally, it is well documented that the

## CRISPR/Cas9-mutagenesis of the *Arabidopsis* GRF family

570 promoter driving Cas9 expression strongly affects the frequency of editing events (reviewed in  
571 [Ma & al., 2016](#); [Soyars & al., 2018](#); we too found tenfold lower mutation rates with the EC1  
572 promoter than the UBI10 promoter).  
573  
574 Competition for a limiting amount of Cas9 would further imply that different sgRNAs associate  
575 with Cas9 apoprotein more or less effectively. The assembly of active CRISPR/Cas9  
576 complexes is accompanied by significant changes in the conformation of Cas9 apoprotein  
577 (reviewed in [Jiang & Dounda, 2017](#)), but the role of the spacer sequence in this process (the  
578 only segment that differs between different sgRNA species) has so far not been described. We  
579 did not notice any obvious hallmarks in the primary sequence, GC-content, melting temperature,  
580 or predicted secondary structure of the GRF guide sequences that seem to correlate with their  
581 activity in our multiplexing experiments. Thus, competition effects as suggested by our results  
582 may be difficult to manage in practice and could pose potentially severe obstacles to  
583 multiplexing strategies.

584

## 585 **Materials & Methods**

586

### 587 **Seed stocks, plant growth & transformation**

588 The Columbia accession of *Arabidopsis thaliana* served as a wild type strain for transformation  
589 and CRISPR/Cas9 mutagenesis. Plants were grown under constant fluorescent light at ~25°C  
590 on commercial potting mix (RediEarth, Sun Gro Horticulture) with slow-release fertilizer  
591 (Osmocote). For germination in sterile culture, seeds were surface sterilized in 70% ethanol for  
592 1 minute, rinsed twice in 96% ethanol, briefly air dried, and transferred to plates containing 1%  
593 sucrose, 1% agar (Sigma A-1296) and 0.5x MS salts (MP Biomedicals 2623022). The GV3101  
594 strain of *Agrobacterium* was used for plant transformation following the floral dip protocol

## CRISPR/Cas9-mutagenesis of the *Arabidopsis* GRF family

595 (Clough & Brent, 1998). Reference alleles created as part of this study can be obtained from  
596 the *Arabidopsis* stock center (abrc.osu.edu): *grf1-3*, CS72426; *grf2-10*, CS72427; *grf3-9*,  
597 CS72428; *grf4-17*, CS72429; *grf5-3*, CS72430; *grf6-9*, CS72431; *grf7-45*, CS72432; *grf8-61*,  
598 CS72433; *grf9-6*, CS72434.

599

### 600 **Imaging**

601 Seed fluorescence was imaged with an Olympus SZX12 stereo-microscope equipped with a  
602 Moticam 3.0 plus digital camera and a Kramer Scientific Quad internal illumination module  
603 connected to an X-cite 120 mercury lamp; filter sets for GFP (Kramer Scientific 184, with narrow  
604 band emission) and propidium iodide (Kramer Scientific 816) were used for YFP- and Tomato-  
605 fluorescence, respectively. The instrument did not have appropriate filters for imaging CFP-  
606 fluorescence. The improvised LED lamps we assessed as a low-cost alternative illumination  
607 are documented in [S1 File](#).

608

### 609 **Plasmid construction**

610 The CRISPR/Cas9 T-DNAs vectors enabling selection and counter-selection on the basis of  
611 seed fluorescence used in this study are available from Addgene (addgene.org): pCEE, [TBA](#);  
612 pYEE, [TBA](#); pTEE, [TBA](#); pCUU, [TBA](#); pYUU, [TBA](#); pTUU, [TBA](#).

613

614 T-DNAs expressing a single or two sgRNA were generated by conventional cloning (as  
615 described by [Xing & al. 2014](#)). T-DNA vectors were linearized by restriction with *BsaI* (we found  
616 that incubation overnight at 45°C gave best results) and gel purified. Vectors to be used in  
617 ligations with PCR products were treated with shrimp alkaline phosphatase (ThermoFisher  
618 78390) prior to gel purification to remove their terminal phosphates. For single-sgRNA  
619 constructs, two non-phosphorylated complementary oligonucleotides encoding the 20 nt gene-

*CRISPR/Cas9-mutagenesis of the Arabidopsis GRF family*

620 specific spacer sequences plus appropriate overlapping ends for cloning (**S2 File**) were mixed  
621 (50  $\mu$ M each, 2X SSC buffer) and annealed in a temperature gradient (96°C – 20°C); 1  $\mu$ L of the  
622 annealing reaction was combined with ~100 ng vector fragment (with intact 5'-phosphate ends)  
623 and ligated with T4 ligase (1 h at RT).

624

625 For two-sgRNA constructs, fragments containing the gene-specific spacer sequences, the  
626 sgRNA backbone and either a U6-29 promoter or a tRNA buffer were produced by four-primer  
627 PCR (described in [Xing & al., 2014](#)) with a proofreading enzyme (Q5 polymerase, New England  
628 Biolabs, M0491). Briefly, the reactions contained a pair of inner and outer primers at a ratio of  
629 1:20 (50 nM and 1  $\mu$ M, respectively); inner primers were designed to anneal to template  
630 plasmids and also encoded the spacer portion of the sgRNAs; outer primers were designed to  
631 use the DNA fragments produced by the inner primers during the first few PCR cycles as  
632 template and also contained sequences required for generating vector-compatible ends by *BsaI*  
633 digestion; in this way, the length of all primers could be limited to ~40nt (**S2 File**). Two plasmids  
634 were used as templates: pGEM-2t, derived from a custom synthetic fragment (Integrated Gene  
635 Technologies, IDT) and containing a sgRNA backbone as well as an alanine tRNA spacer (see  
636 **S3 File** for an annotated sequence listing; the plasmid has been deposited with Addgene, **TBA**);  
637 and pCBC-DT1DT2 ([Xing & al., 2014](#); Addgene #50590), containing a sgRNA backbone as well  
638 as a U6-29 promoter. ~50 ng of *BsaI*-digested, gel-purified PCR products were ligated with  
639 ~100 ng de-phosphorylated vector fragment (16°C, overnight).

640

641 T-DNAs expressing four sgRNAs were assembled from *BsaI*-linearized vectors and three PCR  
642 fragments using an NEBuilder kit (E2621, New England Biolabs). Appropriate PCR fragments  
643 were generated in three- or four-primer reactions similar to the ones described above, with the  
644 outside primer containing the 23-25 nt overlaps required for the assembly reaction (**S2 File**).

645 The sgRNA genes of all constructs were verified by Sanger sequencing.



646

## 647 **Detection & sequencing of mutant alleles**

648 Spacer sequences were selected such that CRISPR/Cas9 would cause a double strand break  
649 within the recognition sequence of a restriction enzyme, enabling the detection of induced  
650 mutations by PCR-based markers ([S2 File](#)). The same primers were used to amplify germline-  
651 transmitted mutant alleles for Sanger sequencing (with internal or PCR primers; [S2 File](#)).

652

## 653 **Amplicon sequencing & data analysis**

654 Two samples of DNA of were generated for the purpose of mass-sequencing GRF mutations:  
655 the '4-sgRNA' sample was extracted from 1151 T2 seedlings: 527 mutagenized with the '1256'  
656 construct (230 from 5 wild type parents, 297 from 5 *grf9-6* parents), 582 T2 mutagenized with  
657 the '3478' construct (297 from 5 wild type, 285 from 5 *grf-6* parents), and 42 controls (described  
658 below); the '8-sgRNA' sample was extracted from 1310 T3 seedlings: 1265 mutagenized with  
659 both constructs (form 20 families of *grf9-6/+* parents), and 51 controls. 10 independent  
660 transformation events of each construct are represented in this population (see Fig. 7 for  
661 pedigree). From each T1 parent or T2 family, ~50 non fluorescent seeds were selected and  
662 grown on plate for 7 days; germinated seedlings were tallied and then combined to generate the  
663 two samples; the sample material was ground in liquid nitrogen and the DNA extracted following  
664 a modified CTAB protocol ([Murray & Thompson, 1980](#)).

665

666 For each GRF gene, ~200 bp amplicons that included the CRISPR/Cas9 target sites were  
667 generated using non-proofreading Taq polymerase; the PCR primers contained tails for library  
668 construction (see [S2 File](#) for details). Amplicons were barcoded and sequenced on an Illumina  
669 platform at the UGA Georgia Genomics and Bioinformatics Core ([dna.uga.edu](http://dna.uga.edu)). The resulting  
670 reads were aligned to a 60 nt wild type reference sequence centered around the predicted

CRISPR/Cas9-mutagenesis of the Arabidopsis GRF family

671 CRISPR/Cas9 cut site and analyzed for insertion and/or deletion events using AGEseq (Xue &  
 672 Tsai, 2015).  
 673  
 674 GRF9 was not mutagenized in the experiment, such that the amplicon could be used to assess  
 675 representation. Both DNA samples included a known number of GRF9 mutant seedlings for this  
 676 purpose. 51% of the seedlings represented in '4sgRNA' were from *grf9-6* parents (582 / 1151),  
 677 and 51% of the mapped GRF9 amplicon reads contained the *grf9-6* mutation; similarly, 97% of  
 678 the seedlings represented in '8sgRNA' were *grf6-1/+* (1265 / 1310), and 50% of all mapped  
 679 reads contained the *grf-6* mutation. In addition, the samples contained 24, 12, and 6 seedlings  
 680 from *grf9-3/grf9-4*, *grf9-1/grf9-2*, and *grf9-7/grf9-8* parents, respectively. The *grf9-2* allele is a  
 681 ~180 bp deletion-insertion event that could not be amplified with our primers; *grf9-3*, *grf9-4* ,  
 682 *grf9-7*, and *grf9-8* harbor small deletions flanking the CRISPR/Cas9 cut site (indicated by a  
 683 star): ttg\*-----atg, gtg\*-----atg, gtg\*ccg, tgg\*-cgt, respectively; *grf9-1* contains a 9 bp insertion  
 684 (upper case letters): tgg\*AGTTTCGGAgga. The representation of these alleles in the two DNA  
 685 samples is summarized in **Table 1**.

686

687 **Table 1. Representation of *grf9* alleles in the sequences**

|                               | Seedlings | Reads | Reads per copy <sup>1</sup> |
|-------------------------------|-----------|-------|-----------------------------|
| <b>'4sgRNA' sample</b>        |           |       |                             |
| All                           | 1151      | 66145 | Expected: 29                |
| <i>grf9-3</i> & <i>grf9-4</i> | 24        | 1411  | 29                          |
| <i>grf9-1</i>                 | 12        | 567   | 47                          |
| <i>grf9-7</i> & <i>grf9-8</i> | 6         | 413   | 34                          |
|                               |           |       | Average: 37 ± 9             |
| <b>'8sgRNA' sample</b>        |           |       |                             |
| All                           | 1310      | 60496 | Expected: 23                |
| <i>grf9-3</i> & <i>grf9-4</i> | 24        | 1268  | 26                          |
| <i>grf9-1</i>                 | 12        | 567   | 48                          |
| <i>grf9-7</i> & <i>grf9-8</i> | 6         | 413   | 39                          |
|                               |           |       | Average: 38 ± 11            |

688 <sup>1</sup> The number of reads generated by one allele of one seedling in the sample; the expected  
 689 value is all mapped reads divided by two-times the number of seedlings in the sample. The

CRISPR/Cas9-mutagenesis of the Arabidopsis GRF family

690 observed values are the number of mutant reads divided by two-times the number of  
 691 seedlings harboring the mutant alleles; an exception is *grf9-1*, which was calculated as  
 692 number of mutant reads divided by the number of seedlings from *grf9-1/grf9-2* parents  
 693 (since *grf9-2* cannot be amplified by our primers). Average  $\pm$  standard deviation of the three  
 694 observed values are indicated for both samples.

695  
 696 AGEseq reported 243 distinct insertion-deletion events in the sequences of GRF1-GRF8  
 697 amplicons (see **Table 2** for a summary statistic and **Fig 8** for details). We discarded 30 of these  
 698 events as likely artifacts, since they were supported by fewer than 50% of the reads expected to  
 699 be generated by one allele of one seedling (the representation of the *grf9* controls showed a  
 700 standard deviation of  $\sim$ 25%, suggesting that this cut-off is inclusive).

701

702 **Table 2. Summary statistic of GRF1–GRF8 amplicon sequencing**

|                             | GRF1   | GRF2   | GRF3   | GRF4   | GRF5   | GRF6  | GRF7   | GRF8   |
|-----------------------------|--------|--------|--------|--------|--------|-------|--------|--------|
| <b>4sgRNA sample</b>        |        |        |        |        |        |       |        |        |
| Mapping rate                | .97    | .97    | .98    | .95    | .97    | .96   | .97    | .91    |
| Mapped reads                | 114483 | 123969 | 99432  | 106500 | 114976 | 92153 | 84857  | 77923  |
| Reads per copy <sup>1</sup> | 50     | 54     | 43     | 46     | 50     | 40    | 37     | 34     |
| Basis <sup>2</sup>          | 52662  | 57026  | 49716  | 53250  | 52889  | 42390 | 42429  | 38962  |
| Indels <sup>3</sup>         | 1112   | 45027  | 1277   | 22327  | 3872   | 16865 | 0      | 5779   |
| Mutation rate <sup>4</sup>  | .02    | .79    | .03    | .42    | .07    | .40   | 0      | .15    |
|                             | .02    | .83    | .03    |        | .07    | .47   | 0      | .12    |
| <b>8sgRNA sample</b>        |        |        |        |        |        |       |        |        |
| Mapping rate                | 0.95   | 0.94   | 0.97   | 0.93   | 0.97   | 0.94  | 0.97   | 0.96   |
| Mapped reads                | 79337  | 120604 | 145741 | 128946 | 134287 | 59646 | 208216 | 133091 |
| Reads per copy <sup>1</sup> | 29     | 46     | 56     | 49     | 51     | 23    | 79     | 51     |
| Basis <sup>2</sup>          | 76957  | 116986 | 141369 | 125078 | 130258 | 57857 | 201970 | 129098 |
| Indels <sup>3</sup>         | 871    | 89789  | 330    | 35892  | 5801   | 18986 | 0      | 14059  |
| Mutation rate <sup>4</sup>  | .01    | .77    | <.01   | .29    | .04    | .32   | 0      | .11    |
|                             | .01    | .85    | .01    |        | .05    | .45   | 0      | .16    |

703 <sup>1</sup> The number of reads expected to be generated by one allele of one seedling in the sample;  
 704 calculated by dividing *mapped reads* by two-times the number of seedlings in the sample (2  
 705 x 1151 for '4sgRNA'; 2 x 1310 for '8sgRNA').

## CRISPR/Cas9-mutagenesis of the Arabidopsis GRF family

706 <sup>2</sup> The number of reads expected from seedlings that had been mutagenized for a given GRF  
707 locus. In the '4sgRNA' sample, 527 seedlings (46%) were from parents harboring the '1256'  
708 construct, 582 (50%) from parents harboring the '3478' construct, and 42 (4%) were control  
709 seedlings; *basis* is calculated as *mapped reads*  $\times$  0.46 for GRF1, GRF2, GRF5, GRF6, and  
710 *mapped reads*  $\times$  0.5 for GRF3, GRF4, GRF7, GRF8. In the '8sgRNA' sample, 1265  
711 seedlings (97%) were from parents harboring both constructs, and 45 (3%) were control  
712 seedlings; thus, *basis* is calculated as *mapped reads*  $\times$  0.97.

713 <sup>3</sup> Insertion-deletion events detected by AGEseq; events supported by fewer reads than *reads*  
714 *per allele* were considered artifacts and not included.

715 <sup>4</sup> Calculated as *indels* / *basis*. To validate the estimates, mutation frequencies were also  
716 estimated using the mapping and SNP-calling functions of Geneious 10.1.2  
717 (<https://www.geneious.com>); the results are listed in cursive below the AGEseq estimates.

718

719

## Supporting Information

720

721 **S1 File. Annotated sequence listing of T-DNA vectors.** (zip format)

722 **S2 File. LED illumination.** (pdf format)

723 **S3 File. Oligonucleotides for plasmid construction and PCR.** (pdf format)

724

725

## Acknowledgements

726

727 We thank Lisa Donovan (U of Georgia, USA) for her generous support of the PBIO3660L lab  
728 course; David Nelson (U of California Riverside, USA) for bringing the pHEE401E toolbox to our  
729 attention; Chengchao Zheng (Shandong Agricultural U, China) and Bob Schmitz (U of Georgia,

*CRISPR/Cas9-mutagenesis of the Arabidopsis GRF family*

730 USA) for kindly sharing pHEE401E and pCBC-DT1DT2 DNA; Magdy Alabady (U of Georgia,  
731 USA) for advice on designing primers for amplicon sequencing; Liangjiao Xue (Nanjing  
732 Forestry U, China) for help with installing the AGE-seq package; Chad Niederhuth (Michigan  
733 State U, USA) and Cordula Schulz (U of Georgia, USA) for valuable comments on the  
734 manuscript.

735

## 736 **Author Contributions**

737

738 *Conceptualization:* Wolfgang Lukowitz

739 *Data Curation:* n/a

740 *Formal Analysis:* n/a

741 *Funding Acquisition:* n/a

742 *Investigation:* Juan Angulo, Christopher P Astin, Olivia Bauer, Kelan J Blash, Natalee M Bowen,

743 Nneoma J Chukwudinma, Austin S Dinofrio, Donald O Faletti, Alexa M Ghulam, Cloe M

744 Gusinde-Duffy, Kamaria J Horace, Andrew M Ingram, Kylie E Isaack, Geon Jeong, Randolph J

745 Kiser, Jason S Kobylanski, Madeline R Long, Wolfgang Lukowitz, Grace A Manning, Julie M

746 Morales, Kevin H Nguyen, Robin T Pham, Monthip H Phillips, Tanner W Reel, Jenny E Seo,

747 Hiep D Vo, Alexander M Wukuson, Kathryn A Yeary, Grace Y Zhang

748 *Methodology:* n/a

749 *Project Administration:* Wolfgang Lukowitz

750 *Resources:* n/a

751 *Software:* n/a

752 *Supervision:* Wolfgang Lukowitz

753 *Validation:* Wolfgang Lukowitz

754 *Visualization:* Wolfgang Lukowitz

*CRISPR/Cas9-mutagenesis of the Arabidopsis GRF family*

755 *Writing – Original Draft Preparation:* Wolfgang Lukowitz  
756 *Writing – Review & Editing:* Juan Angulo, Christopher P Astin, Olivia Bauer, Kelan J Blash,  
757 Natalee M Bowen, Nneoma J Chukwudinma, Austin S Dinofrio, Donald O Faletti, Alexa M  
758 Ghulam, Cloe M Gusinde-Duffy, Kamaria J Horace, Andrew M Ingram, Kylie E Isaack, Geon  
759 Jeong, Randolph J Kiser, Jason S Kobylanski, Madeline R Long, Wolfgang Lukowitz, Grace A  
760 Manning, Julie M Morales, Kevin H Nguyen, Robin T Pham, Monthip H Phillips, Tanner W Reel,  
761 Jenny E Seo, Hiep D Vo, Alexander M Wukuson, Kathryn A Yeary, Grace Y Zhang

762

763

## References

764

765 Chin-Sang I, Zhong W. Using LEDs as a low-cost source to detect GFP and DsRed. WBG.  
766 2008;58, [wbg.wormbook.org/2009/12/01/using-leds-as-a-low-cost-source-to-detect-gfp-and-](http://wbg.wormbook.org/2009/12/01/using-leds-as-a-low-cost-source-to-detect-gfp-and-dsred-2/)  
767 [dsred-2/](http://wbg.wormbook.org/2009/12/01/using-leds-as-a-low-cost-source-to-detect-gfp-and-dsred-2/)

768

769 Clough SJ, Brent AF. Floral dip: a simplified method for *Agrobacterium*-mediated transformation  
770 of *Arabidopsis thaliana*. *Plant J.* 1998;16:735-743. doi: 10.1046/j.1365-313x.1998.00343.x

771

772 Cubitt AB, Woollenweber LA, Heim R. Understanding structure-function relationships in the  
773 *Aequorea victoria* green fluorescent protein. In: Sullivan KF, Kay S (eds). *Methods in cell*  
774 *biology.* 1999;58:19–30. doi: 10.1016/S0091-679X(08)61946-9

775

776 Cutler SR, Erhardt, Griffiths JS, Somerville CR. Random GRF::cDNA fusions enable visualization  
777 of subcellular structures in cells of *Arabidopsis* at high frequency. *Proc Nat Acad Sci USA.*  
778 2000;97:3718–3723. doi: 10.1073/pnas.97.7.3718

779

*CRISPR/Cas9-mutagenesis of the Arabidopsis GRF family*

- 780 Ermolaeva MD, Wu M, Eisen JA, Salzberg SL. The age of the Arabidopsis thaliana genome  
781 duplication. *Plant Mol Biol.* 2003;51:859–866. doi: 10.1023/a:1023001130337  
782
- 783 Gao X, Chen J, Dai X, Zhang D, Zhao Y. An effective strategy for reliably isolating heritable and  
784 Cas9-free Arabidopsis mutants generated by CRISPR/Cas9-mediated genome editing.  
785 *Plant J.* 2016;171:1794–1800. doi: 10.1104/pp.16.00663  
786
- 787 Hajdukiewicz P, Svab Z, Maliga P. The small, versatile pPZP family of Agrobacterium binary  
788 vectors for plant transformation. *Plant Mol Biol.* 1994;25:989–994. doi: 10.1007/BF00014672  
789
- 790 Hwezi T, Maier TR, Nettelton D, Baum TJ. The Arabidopsis microRNA396-GRF1/GRF3  
791 regulatory module acts as a developmental regulator in the reprogramming of root cells  
792 during cyst nematode infection. *Plant Physiol.* 2012;159:321–335. doi:  
793 10.1104/pp.112.193649  
794
- 795 Horiguchi G, Kim G-T, Tsukaya H. The transcription factor AtGRF5 and the transcription  
796 coactivator AN3 regulate cell proliferation in leaf primordia of Arabidopsis thaliana. *Plant J.*  
797 2005;43:68–78. doi: 10.1111/j.1365-313X.2005.02429.x  
798
- 799 Jiang F, Dounda JA. CRISPR-Cas9 structures and mechanisms. *Annu Rev Biophys.*  
800 2017;46:505–529. doi: 10.1146/annurev-biophys-062215-010822  
801
- 802 Jiao Y, Leebens-Mack J, Ayyampalayam S, Bowers J, McKain MR, McNeal J, Rolf M, Rudzicka  
803 DR, Wafula E, Wickett NJ, Wu X, Zhang Y, Wang J, Zhang Y, Carpenter EJ, Deyholos MK,  
804 Kutchan TM, Chanderbali AS, Soltis PS, Stevenson DW, McCombie R, Pires JC, Womg

*CRISPR/Cas9-mutagenesis of the Arabidopsis GRF family*

- 805 GK-S, Soltis DE, dePamphilis CW. A genome triplication associated with early diversification  
806 of the core eudicots. *Genome Biol* 13:R3. doi: 10.1186/gb-2012-13-1-r3  
807
- 808 Jinek M, Chylinski K, Fonfara I, Hauer M, Doudna JA, Charpentier E. A programmable dual-  
809 RNA-guided DNA endonuclease in adaptive bacterial immunity. *Sci.* 2012;337:816–821. doi:  
810 10.1126/science.1225829  
811
- 812 Kim JH, Choi D, Kende H. The AtGRF family of putative transcription factors is involved in leaf  
813 and cotyledon growth in Arabidopsis. *Plant J.* 2003;36:94–104. doi:10.1046/j.1365-  
814 313X.2003.01862.x  
815
- 816 Kim JH, Lee BH (2006) GROWTH-REGULATING FACTOR4 of Arabidopsis thaliana is required  
817 for development of leaves, cotyledons, and shoot apical meristem. *J Plant Biol.*  
818 2006;49:463–468. doi: 10.1007/BF03031127  
819
- 820 Kim J-S, Mizoi J, Kidokoro S, Maruyama K, Nakajima J, Nakashima K, Mitsuda N, Takiguchi Y,  
821 Ohme-Takagi M, Kondou Y, Yoshizumi T, Matsui M, Shinozaki K, Yamaguchi-Shinozaki K.  
822 Arabidopsis GROWTH-REGULATING FACTOR7 functions as a transcriptional repressor of  
823 abscisic acid- and osmotic stress-responsive gene, including DREBA2. *Plant Cell.*  
824 2012;24:3393–3405. doi: 10.1105/tpc.112.100933  
825
- 826 Kim JH. Biological roles and an evolutionary sketch of the GRF-GIF transcriptional complex in  
827 plants. *BMB Rep.* 2019;52:227–238. doi: 10/5483/BMBRep.2019.52.4.051  
828



*CRISPR/Cas9-mutagenesis of the Arabidopsis GRF family*

- 829 Klepikova AV, Kasianov AS, Gerasimov ES, Logacheva MD, Penin AA. A high resolution map of  
830 the Arabidopsis thaliana developmental transcriptome based on RNA-seq profiling. Plant J.  
831 2016;88:1058–1070. doi: 10.1111/tpj.13312  
832
- 833 Lambert TJ. FPbase: a community-editable fluorescent protein database. Nat Meth.  
834 2019;16:277–278. doi: 10.1038/s41592-019-0352-8  
835
- 836 Lee TH, Tang H, Wang X, Paterson AH. PGDD: a database of gene and genome duplication in  
837 plants. Nuc Acid Res. 2012;41:D1152–D1158. doi: 10.1093/nar/gks1104  
838
- 839 Lee S-J, Lee BH, Jung J-H, Park SK, Song JT, Kim JH. GROWTH-REGULATING FACTOR and  
840 GRF-INTERACTING FACTOR specify meristematic cells of gynoecia and anthers. Plant  
841 Physiol. 2018;176:717–729. doi: 10.1104/pp.17.00960  
842
- 843 Li R, Vavrik C, Danna CH. Proxies of CRISPR/Cas9 activity to aid in the identification of  
844 mutagenized Arabidopsis plants. Genes Genome Genet. 2020;10:2033–2042. doi:  
845 10.1534/g3.120.401110  
846
- 847 Ma X, Zhang Q, Zhu Q, Liu W, Chen Y, Qiu R, Wang B, Yang Z, Li H, Lin Y, Xie Y, Shen R,  
848 Chen S, Wang Z, Chen Y, Guo J, Chen L, Zhao X, Dong Z, Liu Y-G. A robust CRISPR/Cas9  
849 system for convenient, high-efficiency multiplex genome editing in monocot and dicot plants.  
850 Mol Plant. 2015;8:1274–1284. doi: 10.1016/j.molp.2015.04.007  
851
- 852 Ma X, Zhu Q, Chen Y, Liu Y-G. CRISPR/Cas9 platforms for genome editing in plants:  
853 developments and applications. Mole Plant. 2016;9:961–974. doi:  
854 10.1016/j.molp.2016.04.009

*CRISPR/Cas9-mutagenesis of the Arabidopsis GRF family*

855

856 Manghwar H, Lindsey K, Zhang X, Jin S. CRISPR/Cas9 system: recent advances and future  
857 prospects for genome editing. *Trend Plant Sci.* 2019;24:1102–1125.

858 doi:10.1016/j.tplants.2019.09.006

859

860 Murray G, Thompson WF. Rapid isolation of high-molecular-weight plant DNA. *Nucl Acid Res*  
861 1980; 8:4321-4325. doi: 10.1093/nar/8.19.4321

862

863 Nagai T, Ibata K, Park ES, Kubota M, Mikoshiba K, Miyawaki A. A variant of yellow fluorescent  
864 protein with fast and efficient maturation for cell-biological applications. *Nat Biotech.*

865 2002;20:87–90. doi: 10.1038/nbt0102-87

866

867 Najera VA, Twyman RM, Christou P, Zhu C. Applications of multiplex genome editing in higher  
868 plants. *Curr Opin Biotech.* 2019;59:93–102. doi: 10.1016/j.copbio.2019.02.015

869

870 Omidbakhshfard MA, Proost S, Fujikura U, Mueller-Roeber B. Growth-regulating factors (GRFs):  
871 a small transcription factor family with important functions in plant biology. *Mol Plant.*

872 2015;8:998–1010. doi: 10.1016/j.molp.2015.01.013

873

874 Osakabe Y, Watanabe T, Sugano SS, Ueta R, Ishihara R, Shinozaki K, Osakabe K.

875 Optimization of CRISPR/Cas9 editing to modify abiotic stress responses in plants. *Sci Rep.*

876 2016;6:26685. doi: 10.1038/srep26685

877

878 Shaner NC, Campbell RE, Steinbach PA, Giepmans BNG, Palmer AE, Tsien RY. Improved  
879 monomeric red orange and yellow fluorescent proteins derived from *Discosoma* sp. red

880 fluorescent protein. *Nat Biotech.* 2004;12:1567–1572. doi: 10.1038/nbt1037

*CRISPR/Cas9-mutagenesis of the Arabidopsis GRF family*

881

882 Sfeir A, Symington LR. Microhomology-mediated end joining: a back-up survival mechanism or  
883 dedicated pathway? *Trends Biochem Sci.* 2015;40:701–714; doi: 10.1016/j.tibs.2015.08.006  
884

885 Soyars CL, Peterson BA, Burr CA, Nimchuk ZL. Cutting edge genetics: CRISPR/Cas9 editing of  
886 plant genomes. *Plant Cell Physiol.* 2018;59:1608–1620. doi: 10.1093/pcp/pcyo79  
887

888 Terns MP, Terns RM. CRISPR-based adaptive immune systems. *Curr Opin Microbiol.*  
889 2011;14:321–327. doi: 10.1016/j.mib.2011.03.005  
890

891 Vision TJ, Brown DG, Tanksley SD. The origins of genomic duplications in Arabidopsis. *Science.*  
892 2000;290:2114–2117. doi: 10.1026/science.290.5499.2114  
893

894 Vu GTH, Cao HX, Fauser F, Reiss B, Puchta H, Schubert I. Endogenous sequence patterns  
895 predispose the repair modes of CRISPR/Cas9-induced DNA double-strand breaks in  
896 Arabidopsis thaliana. *Plant J.* 2017;92:57–57. doi: 10.1111/tpj.13634  
897

898 Wang D, Guo Y, Wu C, Yang G, Li Y, Zheng C. Genome-wide analysis of CCCH zinc finger  
899 family in Arabidopsis and rice. *BMC Genomics.* 2008;9:44. doi: 10.1186/1471-2164-9-44  
900

901 Wang Z-P, Xing H-L, Dong L, Zhang H-Y, Han C-Y, Wang X-C, Chen Q-J. Egg cell-specific  
902 promoter-controlled CRISPR/Cas9 efficiently generates homozygous mutants for multiple  
903 target genes in Arabidopsis in a single generation. *Genome Biol.* 2015;16:144. doi:  
904 10.1186/s13059-015-0715-0  
905

*CRISPR/Cas9-mutagenesis of the Arabidopsis GRF family*

- 906 Wu R, Lucke M, Jang Y-T, Zhu W, Symeonidi E, Wang C, Fitz J, Xi W, Schwab R, Weigel D. An  
907 efficient CRISPR vector toolbox for engineering large deletions in *Arabidopsis thaliana*.  
908 *Plant Meth.* 2018;14:65. doi: 10.1186/s13007-018-0330-7  
909
- 910 Xie K, Zhang J, Yang Y. Genome-wide prediction of highly specific guide RNA spacers for  
911 CRISPR-Cas9-mediated genome editing in model plants and major crops. *Mol Plant*.  
912 2014;5:923–926. doi: 10.1093/mp/ssu009  
913
- 914 Xie K, Minkenberg B, Yang Y. Boosting CRISPR/Cas9 multiplex editing capability with the  
915 endogenous tRNA-processing system. *Proc Nat Acad Sci USA.* 2015;112:3570–3575. doi:  
916 10.1073/pnas.140294112  
917
- 918 Xing H-L, Dong L, Wang Z-P, Zhang H-Y, Han C-Y, Liu B, Wang C-X, Chen Q-J. A  
919 CRISPR/Cas9 toolkit for multiple genome editing in plants. *BMC Plant Biol.* 2014;14:327.  
920 doi: 10.1186/s12870-014-0327-y  
921
- 922 Xue L-J, Tsai C-J. AGEseq: analysis of genome editing by sequencing. *Mol Plant.* 2015;8:1428–  
923 1430. doi: 10.1016/j.molp.2015.06.001  
924
- 925 Zhang Y, Malzahn AA, Sretenovic S, Qi Y. The emerging and uncultivated potential of CRISPR  
926 technology in plant science. *Nat Plant.* 2019;5:778–794. doi: 10.1038/s41477-019-0461-5  
927
- 928 Zhang Z, Mao Y, Liu W, Botella JR, Zhu J-K. A multiplex CRISPR/Cas9 platform for fast and  
929 efficient editing of multiple genes in *Arabidopsis*. *Plant Cell Rep.* 2016;35:1519–1533. doi:  
930 10.1007/s00299-015-1900-z  
931
